# Supplementary material for: Regulation of mTOR complexes in long-lived growth hormone receptor knockout and Snell dwarf mice
Source: publisher site journal article supplement (doi:10.18632/aging.203959), 2022-03-19
Supplement: Supplementary file [file aging-v14i6-203959-supplementary-material-SD1.pdf]

## SUPPLEMENTARY FIGURES

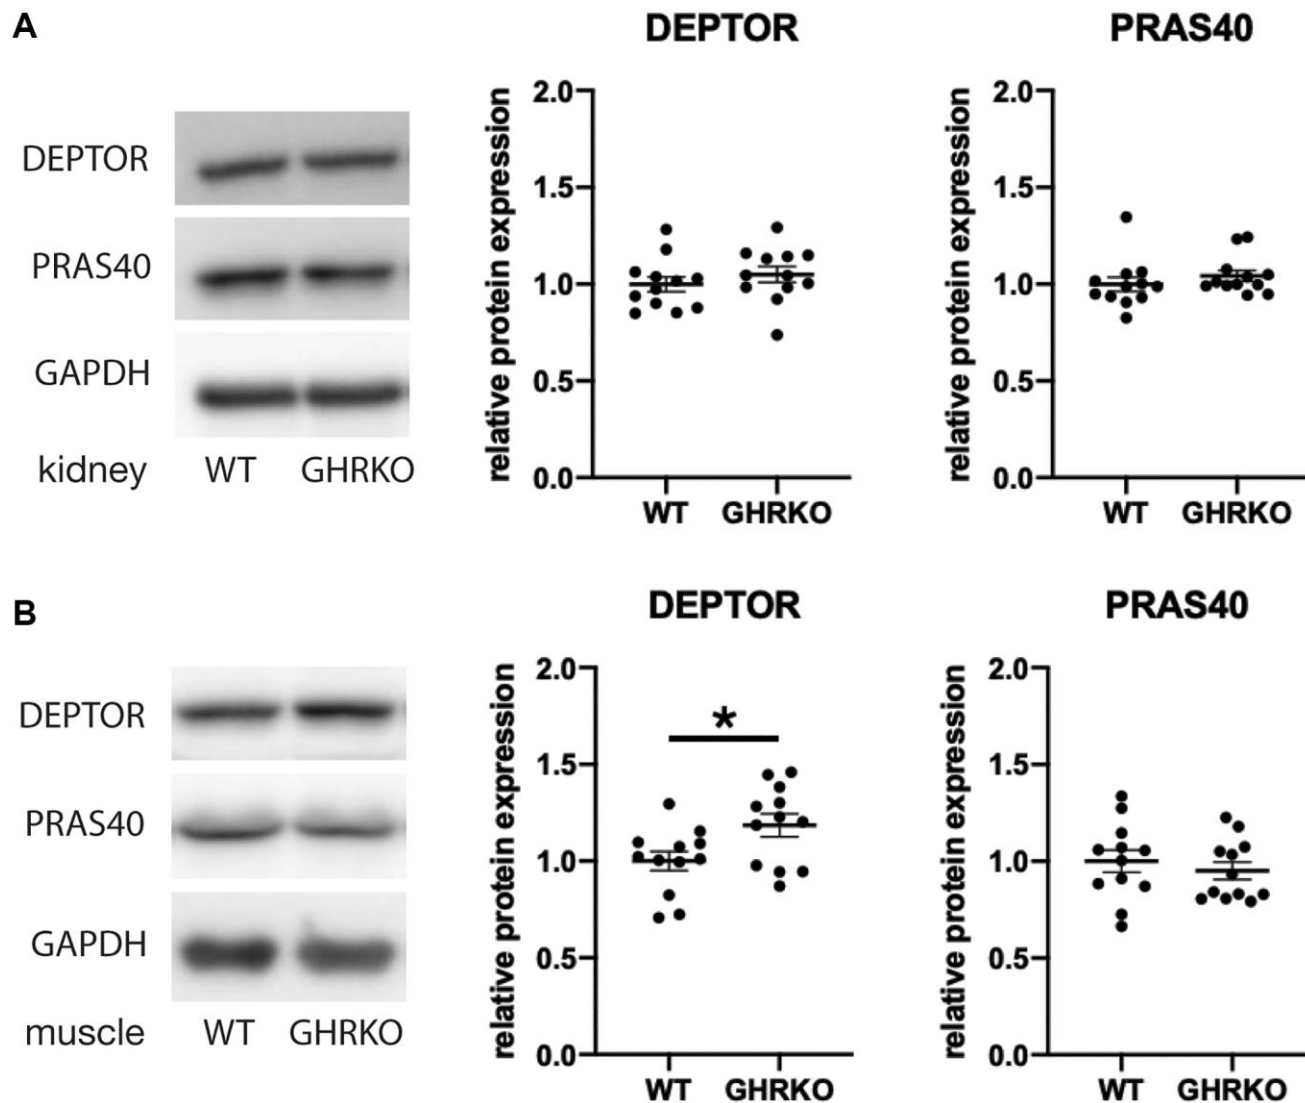

**Supplementary Figure 1. DEPTOR and PRAS40 are not reduced in GHRKO kidney and muscle.** (A) Protein expression of DEPTOR and PRAS40 in GHRKO kidney. (B) Protein expression of DEPTOR and PRAS40 in GHRKO muscle.  $N = 6$  male and  $N = 6$  female mice. \* $t$ -test  $p < 0.05$ .

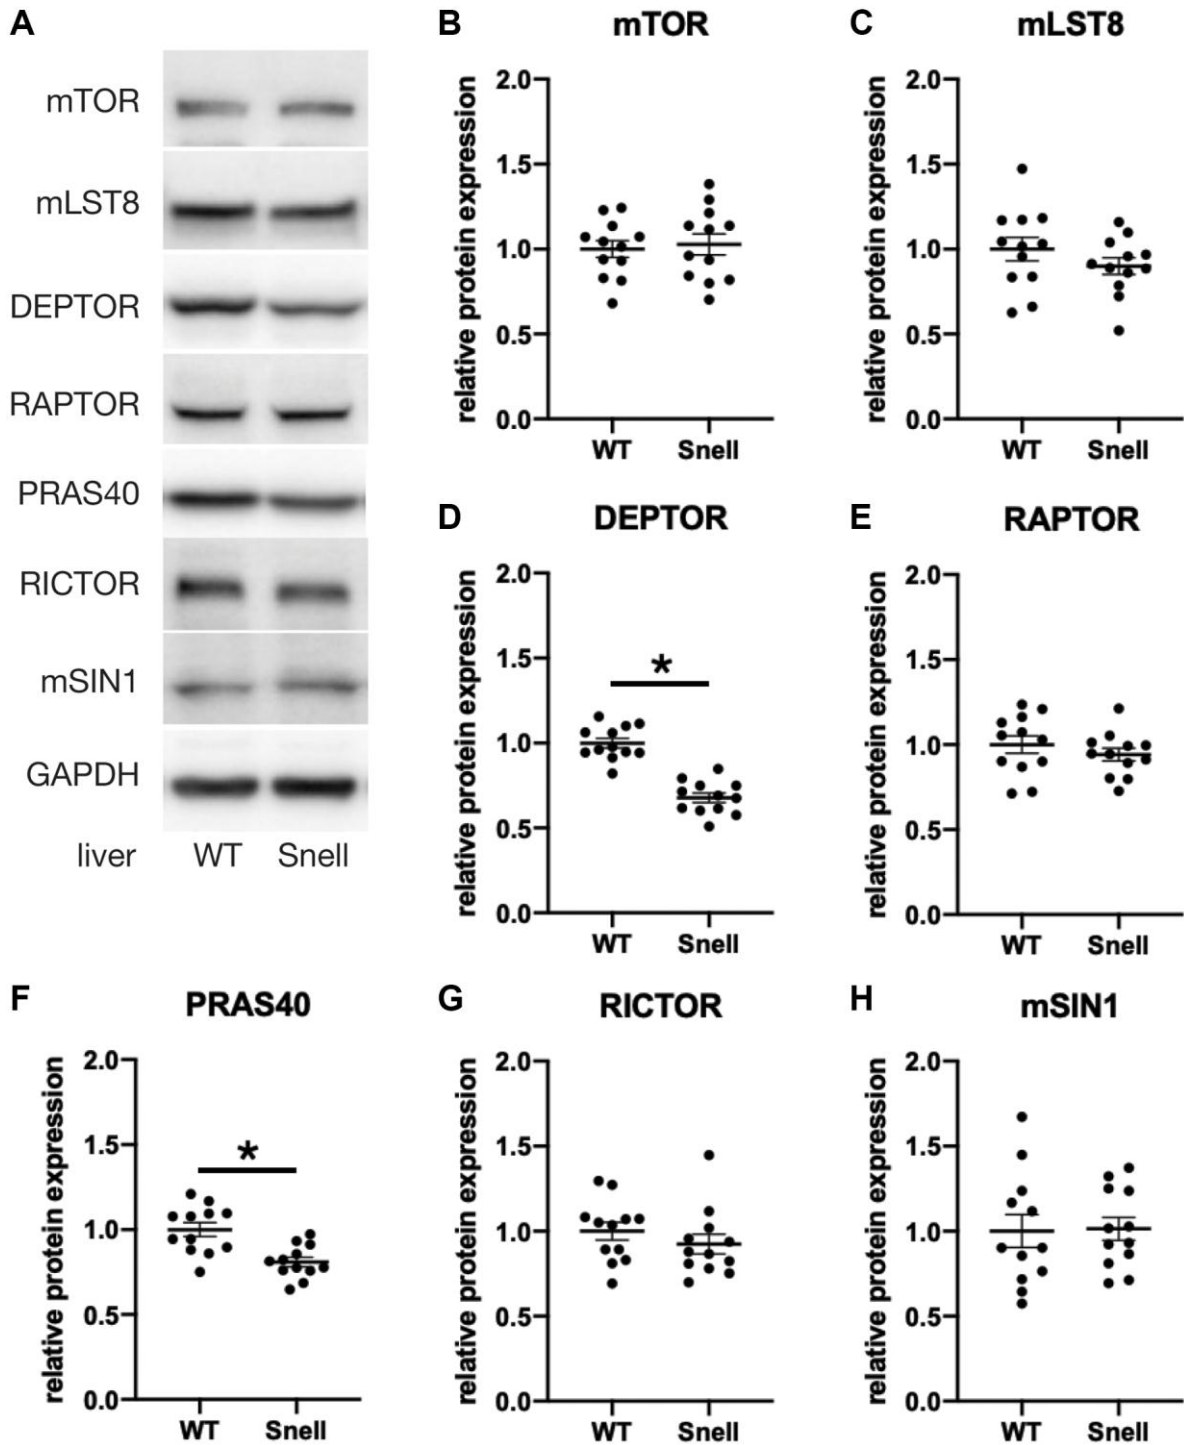

**Supplementary Figure 2. Reduced DEPTOR and PRAS40 protein expression in Snell dwarf liver.** (A) Representative immunoblots of protein expression for mTORC1 and mTORC2 components. (B–H) Quantification of protein expression, for  $N = 6$  male and  $N = 6$  female mice, with mean and SEM. \* $t$ -test  $p < 0.05$ .

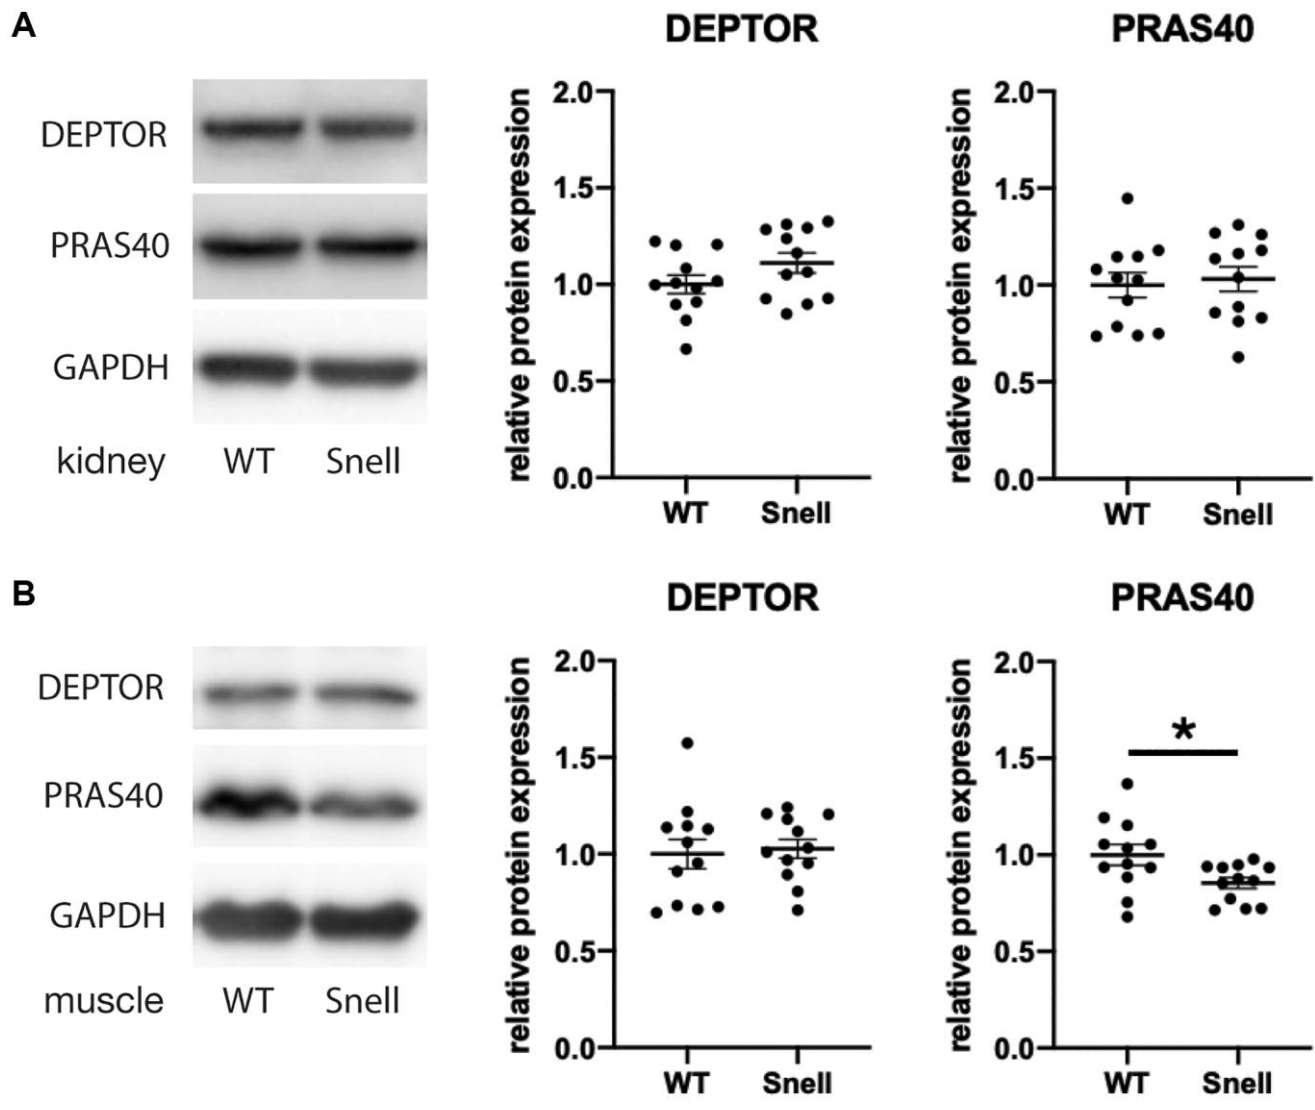

**Supplementary Figure 3. PRAS40 is reduced in Snell dwarf muscle.** (A) Protein expression of DEPTOR and PRAS40 in Snell dwarf kidney. (B) Protein expression of DEPTOR and PRAS40 in Snell dwarf muscle.  $N = 6$  male and  $N = 6$  female mice. \* $t$ -test  $p < 0.05$ .

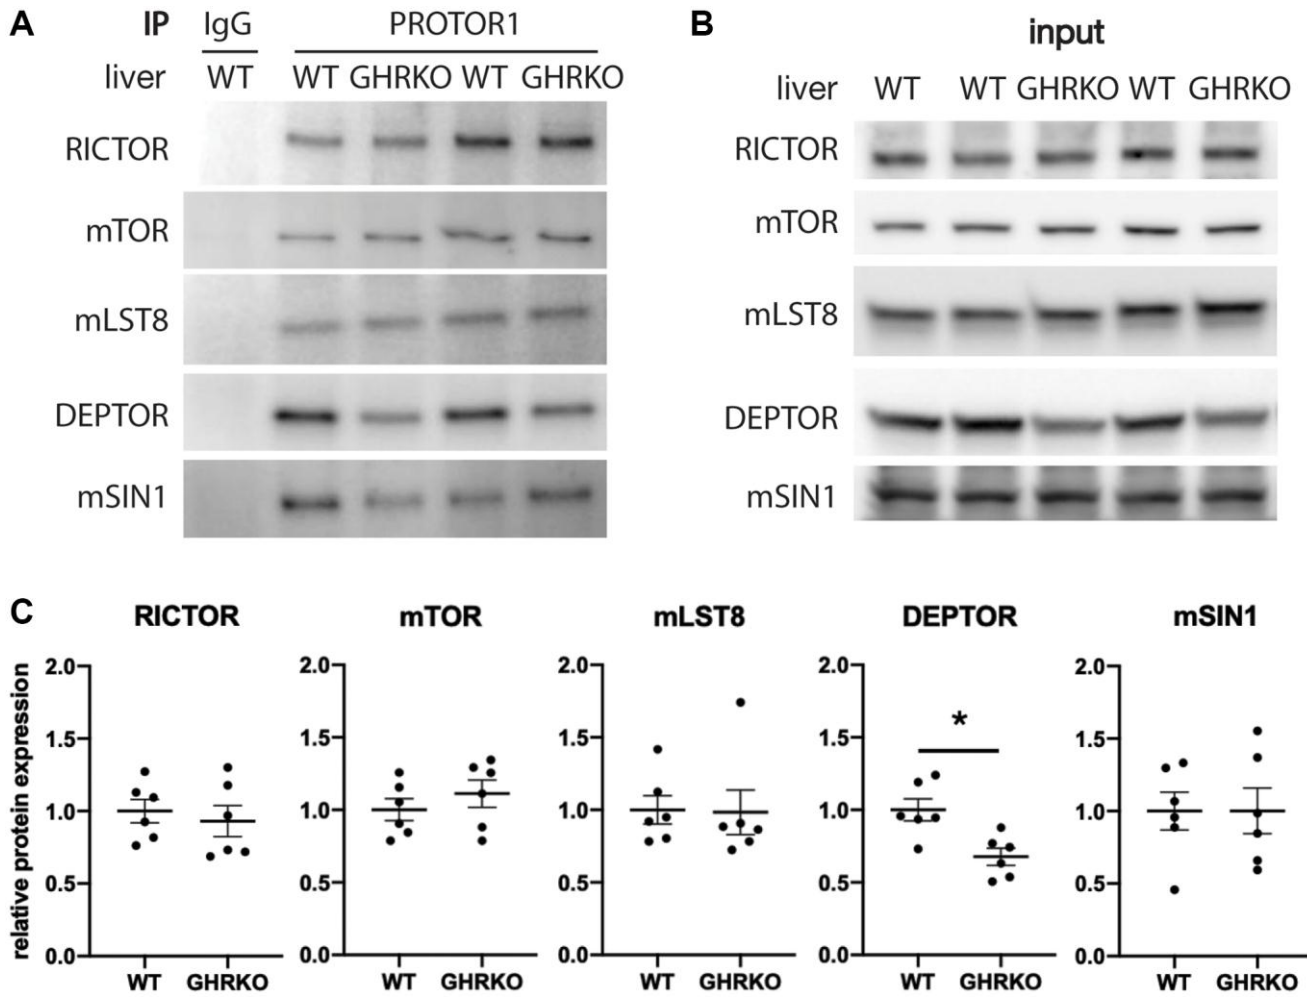

**Supplementary Figure 4. Unchanged PROTOR1 level in mTORC2.** (A) Representative immunoblots of the mTORC2 components from samples immunoprecipitated with PROTOR1 antibody. (B) Input samples for (A). (C) Quantification of proteins in experiments of the kind shown in (A).  $N = 6$ . \* $t$ -test  $p < 0.05$ .

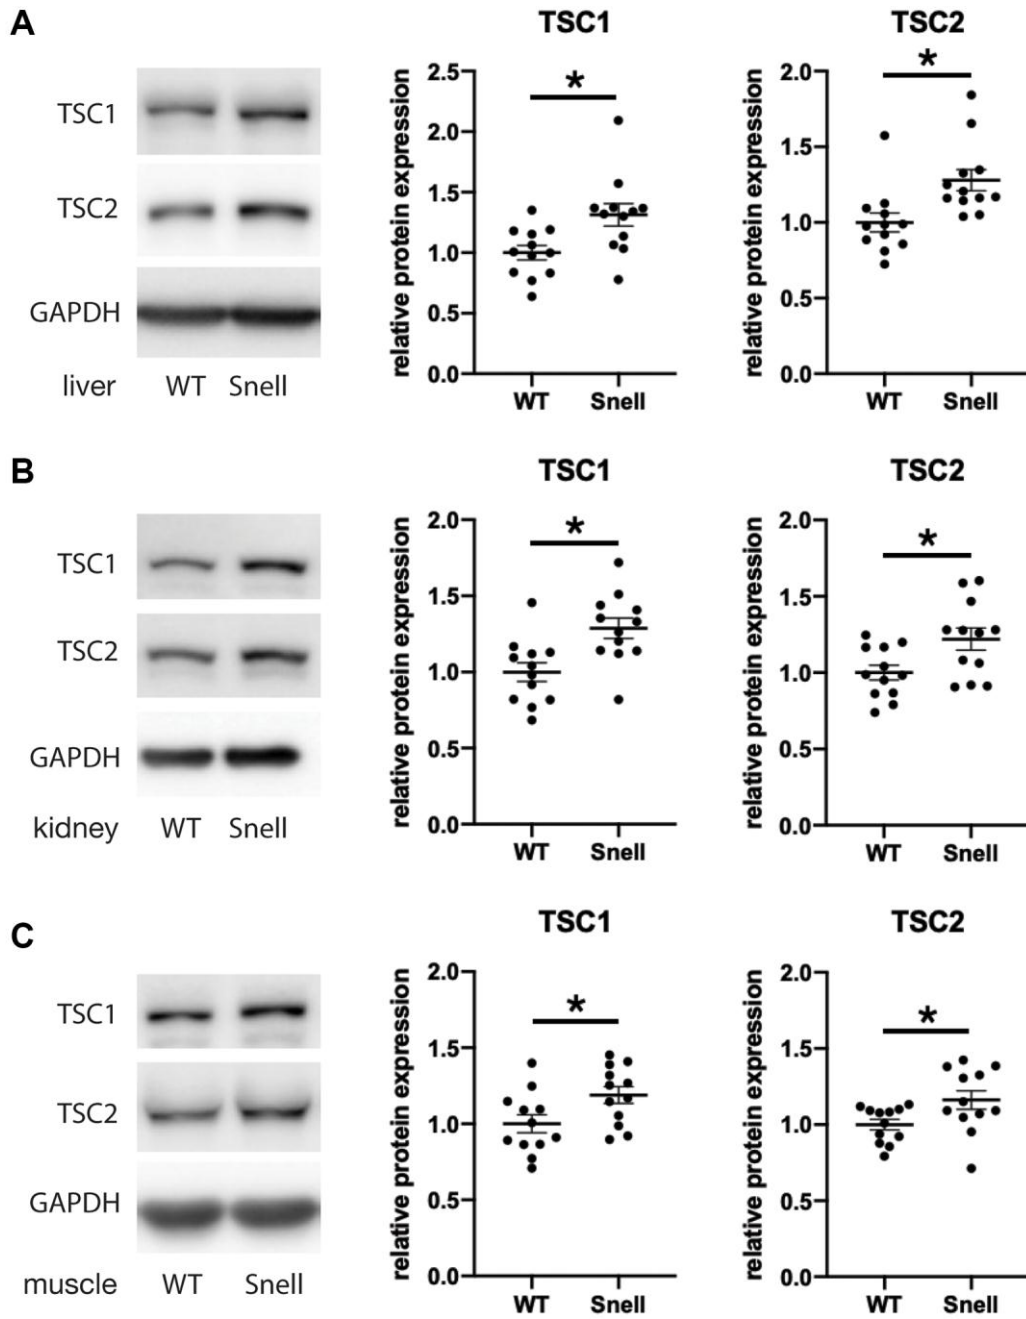

**Supplementary Figure 5. TSC1 and TSC2 are increased in Snell dwarf tissues.** TSC1 and TSC2 protein expression in Snell dwarf liver (A), kidney (B), and muscle (C).  $N = 6$  male and  $N = 6$  female mice. \* $t$ -test  $p < 0.05$ .
