# Supplementary material for: Regulation of mTOR complexes in long-lived growth hormone receptor knockout and Snell dwarf mice
Source: publisher site journal article supplement (doi:10.18632/aging.203959), 2022-03-19
Supplement: Supplementary file [file aging-v14i6-203959-supplementary-material-SD2.pdf]

## SUPPLEMENTARY TABLE

Supplementary Table 1. List of antibodies.

| Name        | Source       | Catalog    |
|-------------|--------------|------------|
| GAPDH       | Cell Signal  | 2118S      |
| mTOR        | Cell Signal  | 2972S      |
| mLST8       | Cell Signal  | 3274S      |
| DEPTOR      | Novus Bio    | NBP1-49674 |
| RAPTOR      | ThermoFisher | 42-4000    |
| PRAS40      | Cell Signal  | 2691S      |
| RICTOR      | Abcam        | ab70374    |
| mSIN1       | Abcam        | ab64188    |
| PROTOR1     | Bethyl lab   | A304-187A  |
| TSC1        | Cell Signal  | 6935S      |
| TSC2        | Cell Signal  | 4308S      |
| pTSC2 S939  | Cell Signal  | 3615S      |
| pTSC2 T1462 | Cell Signal  | 3617S      |
| p4EBP1      | Cell Signal  | 2855S      |
| 4EBP1       | Cell Signal  | 9644S      |
| pS6K        | Cell Signal  | 9234S      |
| S6K         | Cell Signal  | 9202S      |
| pAKT S473   | Cell Signal  | 4060S      |
| pAKT T450   | Cell Signal  | 9267S      |
| AKT         | Cell Signal  | 9272S      |
| GHR         | R&D Systems  | AF1360     |
| rabbit IgG  | Cell Signal  | 2729S      |
| anti-rabbit | Abcam        | ab205718   |
| anti-goat   | R&D Systems  | HAF017     |
